# Supplementary material for: Evaluation of Glycemic Index Education in People Living with Type 2 Diabetes: Participant Satisfaction, Knowledge Uptake, and Application
Source: MDPI journal article supplement (doi:10.3390/nu12082416), 2020-08-12
Supplement: s1 [file s1]

## Supplementary Materials

Table S1: Questions from GIQ Section 1: How did you like the GI class?

| Open-ended questions                                                                                                                                                                           |
|------------------------------------------------------------------------------------------------------------------------------------------------------------------------------------------------|
| If you learned something new today, what was the most important thing you learned?                                                                                                             |
| What can we do to make the class better?                                                                                                                                                       |
| Close-ended questions                                                                                                                                                                          |
| Who are you? <ul style="list-style-type: none"><li>▪ Patient / friend of patient / spouse of partner of patient</li></ul>                                                                      |
| Did you learn anything new at this GI class? <ul style="list-style-type: none"><li>▪ Yes / no</li></ul>                                                                                        |
| The class content was easy to understand <ul style="list-style-type: none"><li>▪ Strongly agree / agree / neither agree nor disagree / disagree / strongly disagree</li></ul>                  |
| The class content was interesting <ul style="list-style-type: none"><li>▪ Strongly agree / agree / neither agree nor disagree / disagree / strongly disagree</li></ul>                         |
| The teacher was easy to understand <ul style="list-style-type: none"><li>▪ Strongly agree / agree / neither agree nor disagree / disagree / strongly disagree</li></ul>                        |
| The teacher's assistants were easy to understand <ul style="list-style-type: none"><li>▪ Strongly agree / agree / neither agree nor disagree / disagree / strongly disagree</li></ul>          |
| The handouts helped me learn the class content <ul style="list-style-type: none"><li>▪ Strongly agree / agree / neither agree nor disagree / disagree / strongly disagree</li></ul>            |
| The presentation helped me learn the class content <ul style="list-style-type: none"><li>▪ Strongly agree / agree / neither agree nor disagree / disagree / strongly disagree</li></ul>        |
| The hands-on activities helped me learn the class content <ul style="list-style-type: none"><li>▪ Strongly agree / agree / neither agree nor disagree / disagree / strongly disagree</li></ul> |
| I think that what I learned today will help me make changes to my diet                                                                                                                         |

- 
- Strongly agree / agree / neither agree nor disagree / disagree / strongly disagree
- 

Table S2: Questions from GIQ Section 2: Getting to know you

---

| <b>Open-ended questions</b>                                                                                                                                                                     |
|-------------------------------------------------------------------------------------------------------------------------------------------------------------------------------------------------|
| If you were not born in Canada, what year did you move here?                                                                                                                                    |
| What is the main language you speak at home?                                                                                                                                                    |
| Please list all jobs you have held in the past year for more than one month                                                                                                                     |
| <b>Close-ended questions</b>                                                                                                                                                                    |
| What is your sex?                                                                                                                                                                               |
| <ul style="list-style-type: none"><li>▪ Male / female / pass</li></ul>                                                                                                                          |
| Which ethnic group do you identify with?                                                                                                                                                        |
| <ul style="list-style-type: none"><li>▪ Aboriginal / European / African or Caribbean / West Indian / Latin American / Indian / Middle Eastern / East Asian / South East Asian / other</li></ul> |
| Were you born in Canada?                                                                                                                                                                        |
| <ul style="list-style-type: none"><li>▪ Yes / no</li></ul>                                                                                                                                      |
| In your home, who purchases the food most often?                                                                                                                                                |
| <ul style="list-style-type: none"><li>▪ I do / my spouse or partner / my parent(s) / my children / my roommate / other</li></ul>                                                                |
| In your home, who makes the meals most often?                                                                                                                                                   |
| <ul style="list-style-type: none"><li>▪ I do / my spouse or partner / my parent(s) / my children / my roommate / other</li></ul>                                                                |
| What is the highest level of education you have finished?                                                                                                                                       |
| <ul style="list-style-type: none"><li>▪ High school or equivalent / college certificate or diploma / undergraduate degree / graduate degree / other</li></ul>                                   |
| How do you treat or control your diabetes today? Choose all that apply.                                                                                                                         |
| <ul style="list-style-type: none"><li>▪ Diet / exercise / oral medication / insulin / other</li></ul>                                                                                           |
| Have you ever met with a dietitian before to talk about diet?                                                                                                                                   |
| <ul style="list-style-type: none"><li>▪ Yes / no / I am not sure</li></ul>                                                                                                                      |
| Have you ever heard of the glycemic index?                                                                                                                                                      |
| <ul style="list-style-type: none"><li>▪ Yes / no / I am not sure</li></ul>                                                                                                                      |
| Do you know what the glycemic index is?                                                                                                                                                         |
| <ul style="list-style-type: none"><li>▪ Yes / no</li></ul>                                                                                                                                      |

---

---

Have you been taught about the glycemic index from a health professional before?

- Yes / no
- 

Table S3: Questions from GIQ Section 3: What do you know about GI?

---

**Close-ended questions**

---

Which of the words below best describes your knowledge of GI?

- Poor / fair / good / very good / excellent
- 

The GI is a tool we can use to group carbohydrate foods by the effect they have on blood sugar

- True / false / I do not know
- 

Which breakfast food has the lowest GI?

- Corn flakes / white bread / bran buds / oatmeal / bran flakes / I do not know
- 

Which meal has the lowest GI?

- Canned pasta in tomato sauce / "al dente" spaghetti in tomato sauce / instant white rice with tomato sauce / a hamburger on a white bun with French fries / I do not know
- 

The GI is a number between 1 and 100

- True / false / I do not know
- 

According to the Canadian Diabetes Association, a high GI food is a food that has a GI of:

- Less than 55 / between 56 and 69 / 70 or more / I do not know
- 

The GI of a white potato will be the lowest when served as:

- A cold potato salad with olive oil / a hot baked potato with butter / a warm boiled potato with salsa / a warm potato salad with olive oil / I do not know
- 

Which snack food has the highest GI?

- Popcorn / Ryvita rye crisps / pretzels / couscous / I do not know
- 

Which foods are absorbed most quickly?

- Low GI foods / medium GI foods / high GI foods / acidic foods / I do not know
- 

Foods that are broken down fast by the body are:

- Medium GI foods / high GI foods / low GI foods / super foods / I do not know
-

|                                                                                                                                                                                         |
|-----------------------------------------------------------------------------------------------------------------------------------------------------------------------------------------|
| The GI ranks food by how much it raises                                                                                                                                                 |
| <ul style="list-style-type: none"> <li>▪ Flatulence (farting) / blood protein / calories / blood sugar / I do not know</li> </ul>                                                       |
| Medium to high GI foods will raise your blood sugar ____ than low GI foods                                                                                                              |
| <ul style="list-style-type: none"> <li>▪ Faster and higher / slower and higher / slower and lower / medium to high GI foods will not affect your blood sugar / I do not know</li> </ul> |
| Fresh meat, fish and poultry have a GI of:                                                                                                                                              |
| <ul style="list-style-type: none"> <li>▪ 0 / meat, fish and poultry do not have a GI / 55 / between 72 and 100 / I do not know</li> </ul>                                               |

Table S4: Questions from GIQ Section 4: Is your low GI diet working for you?

|                                                                                                                                     |
|-------------------------------------------------------------------------------------------------------------------------------------|
| <b>Open-ended questions</b>                                                                                                         |
| How would you describe your experience adding low GI foods to your diet?                                                            |
| <b>Close-ended questions</b>                                                                                                        |
| Since the GI class, I have added low GI foods to my diet                                                                            |
| <ul style="list-style-type: none"> <li>▪ True / false</li> </ul>                                                                    |
| Since the GI class, what percentage of your total intake of starchy foods has been low GI?                                          |
| <ul style="list-style-type: none"> <li>▪ 0% / 0 to 25% / 26 to 50% / 51 to 75% / 76 to 100% / I am not sure</li> </ul>              |
| Please choose the word below that best describes your ability to choose low GI foods in the supermarket                             |
| <ul style="list-style-type: none"> <li>▪ Poor / fair / good / very good / excellent</li> </ul>                                      |
| How would you rate your skill at choosing low GI foods when eating out of the home?                                                 |
| <ul style="list-style-type: none"> <li>▪ Poor / fair / good / very good / excellent</li> </ul>                                      |
| How would you rate your skill at using low GI foods in meal planning?                                                               |
| <ul style="list-style-type: none"> <li>▪ Poor / fair / good / very good / excellent</li> </ul>                                      |
| How would you rate your ability to make traditional meals with low GI foods?                                                        |
| <ul style="list-style-type: none"> <li>▪ Poor / fair / good / very good / excellent / this question does not apply to me</li> </ul> |
| Since the class, have the people you live with been eating low GI foods?                                                            |
| <ul style="list-style-type: none"> <li>▪ Yes / no / this question does not apply to me</li> </ul>                                   |
| Overall, how would you say your house mates would rate the low GI foods?                                                            |

- 
- Poor / fair / good / very good / excellent / this question does not apply to me
- 

Have you noticed any changes in the symptoms, listed below, since the GI class?

- Constipation / hunger between meals / bloating / diarrhea / nausea / stomach ache / gas or flatulence
    - Answer yes / no and increase / decrease for each
- 

How would you rate the taste of the lower GI food choices you have made since the GI class?

- Poor / fair / good / very good / excellent
- 

Planning low GI meals does not require more time than planning other meals

- True / false
- 

Low GI foods cost the same as other foods

- True / false
- 

Do you think you will continue to eat low GI foods after this study is over?

- Yes / no
-
